# Supplementary material for: Assessing Illumina technology for the high-throughput sequencing of bacteriophage genomes
Source: PubMed Central journal article supplement (PMC4893331; doi:10.7717/peerj.2055), 2016-06-01
Supplement: peerj-04-2055-s003.pdf [file peerj-04-2055-s003.pdf]

% of genome on a single contig

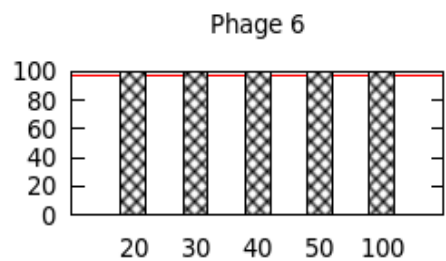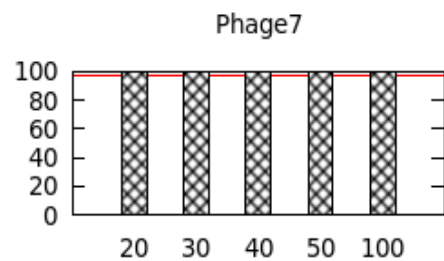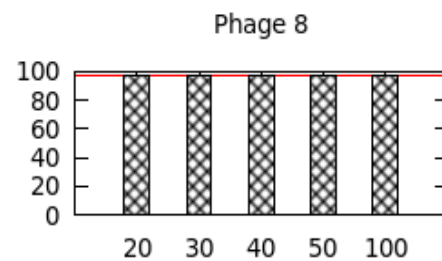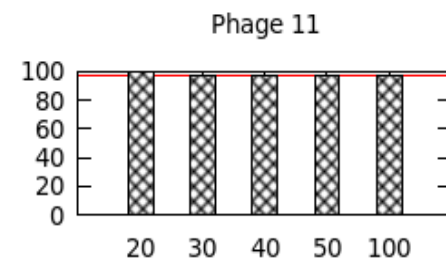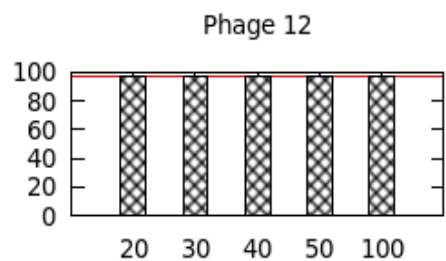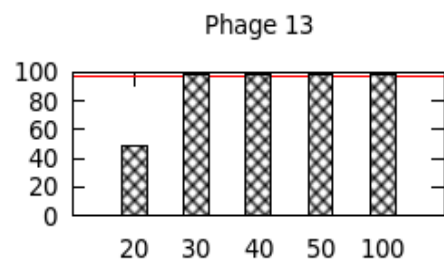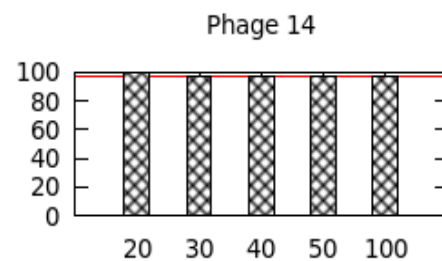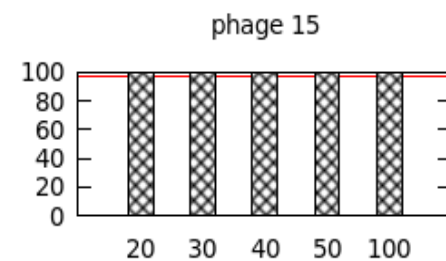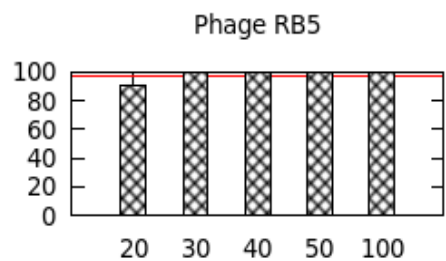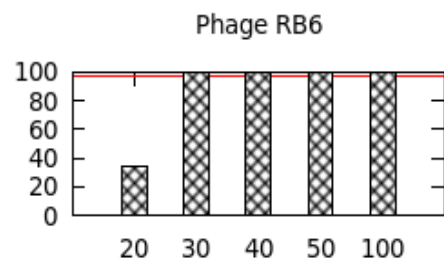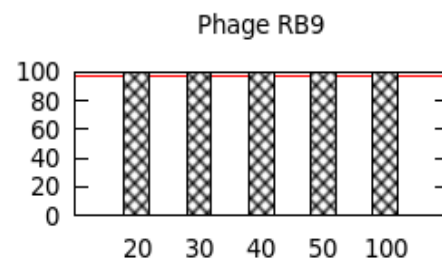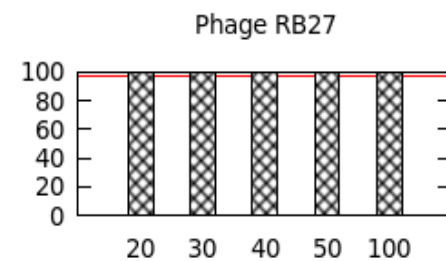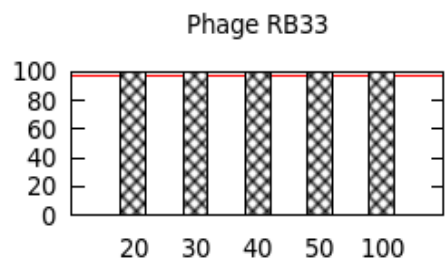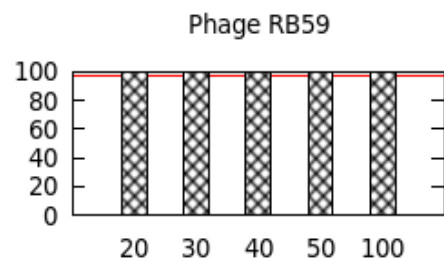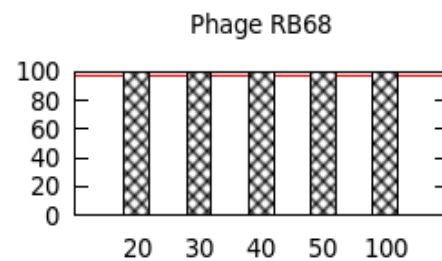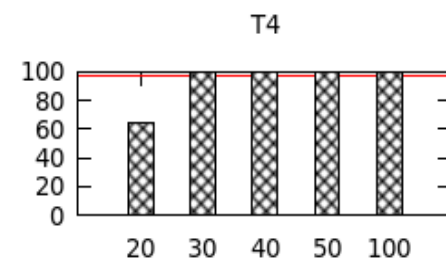

Sequencing depth
